# Supplementary material
Source: publisher figshare collection journal article supplement (https://rs.figshare.com/ndownloader/files/17380226)
Supplement: Supplementary file 1 [file 17380226]

## Sheet: Sheet1
Genus	Species	Date	Country	Lat	Long	Stage	Relative numbers	Comment
Vanessa	cardui	23.X.1975	Nigeria	9.73287	8.80208	Larva
Vanessa	cardui	XI.1975	Nigeria	9.73287	8.80208	Larva
Vanessa	cardui	5.VIII.1978	Sweden	58.3579	11.3295	Larva	15
Vanessa	cardui	5.VIII.1978	Sweden	58.3579	11.3295	Larva	15
Vanessa	cardui	2.VIII.1979	Sweden	58.344	11.3264	Larva	10
Vanessa	cardui	2.VIII.1979	Sweden	58.344	11.3264	Larva	10
Vanessa	cardui	22.VII.1980	Spain	42.9025	-5.14778	Larva
Vanessa	cardui	30.VIII.1985	France	48.9972	6.05508	Larva
Vanessa	cardui	13.IV.1986	Israel	31.74	35.2159	Larva
Vanessa	cardui	16.VII.1998	Greece	37.934	22.2369	Larva
Vanessa	cardui	VI.1989	Italy	42.1409	12.1341	Pupa	2
Vanessa	cardui	VII.1989	Italy	42.1409	12.1341	Pupa	1
Vanessa	cardui	1.IV.1991	Spain	27.8821	-15.7212	Larva
Vanessa	cardui	1.IV.1991	Spain	27.8821	-15.7212	Larva
Vanessa	cardui	8.VIII.1992	Greece	40.601	21.3538	Larva
Vanessa	cardui	VI.1992	Italy	42.4604	12.9957	Larva	1
Vanessa	cardui	25.VI.1995	Sweden	56.6653	16.3245	Larva	3
Vanessa	cardui	19.XI.1995	Turkey	36.59	33.3396	Larva	1000
Vanessa	cardui	VIII.1996	Spain	42.4714	1.10134	Larva
Vanessa	cardui	V.1997	Cyprus	34.7309	33.085	Pupa	1
Vanessa	cardui	3.IX.1997	Netherlands	51.8782	4.35546	Larva	1
Vanessa	cardui	I.1999	Cyprus	34.5937	32.996	1 Larva 1 Pupa	2
Vanessa	cardui	VII.2000	Germany	48.3854	9.56906	Larva
Vanessa	cardui	VII.2000	Germany	48.5811	9.69316	Larva
Vanessa	cardui	2.IV.2001	Greece	37.8036	26.8207	Larva
Vanessa	cardui	2.IV.2001	Greece	37.8036	26.8207	Larva
Vanessa	cardui	XI.2001	Portugal	38.0653	-7.90058	Pupa	1
Vanessa	cardui	16.VII.2001	Turkey	38.1504	43.197	Larva
Vanessa	cardui	11.VII.2002	France	49.3459	6.26735	Larva	1
Vanessa	cardui	X.2002	Italy	41.8898	12.4561	egg	1
Vanessa	cardui		Belgium					Data available from Waarnemingen.be (Natuurpunt and Stichting Natuurinformatie) under request to database managers
Vanessa	cardui		Belgium					Data available from Waarnemingen.be (Natuurpunt and Stichting Natuurinformatie) under request to database managers
Vanessa	cardui		Belgium					Data available from Waarnemingen.be (Natuurpunt and Stichting Natuurinformatie) under request to database managers
Vanessa	cardui	7.VII.2003	Belgium	50.254	5.99582	Larva
Vanessa	cardui		Belgium					Data available from Waarnemingen.be (Natuurpunt and Stichting Natuurinformatie) under request to database managers
Vanessa	cardui	7.VII.2003	Germany	52.0469	12.5684	Larva
Vanessa	cardui	6.VI.2003	Greece	40.9588	22.8254	Eggs	5
Vanessa	cardui	21.IX.2003	Italy	41.3868	13.5306	Larva	1
Vanessa	cardui	30.VII.2003	Norway	59.0222	10.0238	Larva
Vanessa	cardui	19.VII.2003	UK	51.3528	-1.11625	Larva
Vanessa	cardui	31.VII.2003	UK	51.3993	-1.27689	Pupa
Vanessa	cardui	4.V.2004	Spain	42.9764	-5.00589	Larva	2
Vanessa	cardui	4.V.2004	Spain	42.9764	-5.00589	Larva	2
Vanessa	cardui	10.VII.2004	Spain	42.6689	-5.63199	Larva	1
Vanessa	cardui	VI.2005	Italy	45.0834	11.7864	Larva
Vanessa	cardui	10.VIII.2005	Netherlands	52.7937	5.05809	Larva	1
Vanessa	cardui	5.XI.2005	Spain	40.083	-6.03553	Larva	50
Vanessa	cardui	5.XI.2005	Spain	40.083	-6.03553	Larva	50
Vanessa	cardui	6.VII.2006	Belgium	50.4644	4.178	Pupa	1
Vanessa	cardui	6.VII.2006	Belgium	50.4644	4.178	Pupa	1
Vanessa	cardui	1.VII.2006	Belgium	50.4589	4.11275	Larva	1
Vanessa	cardui	6.VII.2006	Belgium	50.4644	4.178	Pupa	1
Vanessa	cardui	6.VII.2006	Belgium	50.4644	4.178	Pupa	1
Vanessa	cardui	1.VII.2006	Belgium	50.4589	4.11275	Larva	1
Vanessa	cardui	18.VIII.2006	France	42.5594	1.99744	Larva	1
Vanessa	cardui	16.IV.2006	France	49.392	3.03348	Larva	1
Vanessa	cardui	13.IX.2006	France	48.1776	3.08905	Larva
Vanessa	cardui	28.V.2006	Germany	48.4725	11.9174	Egg
Vanessa	cardui	7.VII.2006	Germany	51.1937	6.97282	Pupa
Vanessa	cardui	24.VI.2006	Germany	50.0013	8.23019	Larva
Vanessa	cardui	7.VII.2006	Germany	51.1937	6.97282	Pupa
Vanessa	cardui	22.IX.2006	Germany	47.0936	7.14782	Larva
Vanessa	cardui	9.VII.2006	Netherlands	52.3031	5.67603	Larva	5
Vanessa	cardui	29.V.2006	Spain	42.1359	1.58275	Larva	2
Vanessa	cardui	5.XI.2006	Spain	28.1842	-17.2294	Larva	2
Vanessa	cardui	22.XI.2006	Spain	28.1842	-17.2294	Pupa	1
Vanessa	cardui	5.XI.2006	Spain	28.1842	-17.2294	Larva	2
Vanessa	cardui	16.VII.2006	UK	51.0973	-0.598272	Larva
Vanessa	cardui	16.VII.2006	UK	51.0969	-0.599	Larva	2
Vanessa	cardui	15.VIII.2007	Austria	47.1257	12.9541	Larva
Vanessa	cardui	2.V.2007	France	43.6974	7.25094	Larva
Vanessa	cardui	2.V.2007	France	43.6974	7.25094	Larva
Vanessa	cardui	30.VI.2007	France	47.6968	2.53005	Larva
Vanessa	cardui	7.VI.2007	Germany	48.0841	7.74482	Egg
Vanessa	cardui	30.VI.2007	Germany	53.6043	9.9139	Larva
Vanessa	cardui	XI.2007	Israel	29.6664	34.9387	Oviposition	500
Vanessa	cardui	2.VII.2007	Netherlands	51.8725	6.02602	Larva	10
Vanessa	cardui	3.VI.2007	Netherlands	52.5493	5.8403	Larva	1
Vanessa	cardui	2.VII.2007	Netherlands	51.8725	6.02602	Larva	10
Vanessa	cardui	19.VII.2007	Netherlands	51.06	5.78018	Larva	5
Vanessa	cardui	14.VII.2007	Netherlands	52.1459	6.86284	Larva	1
Vanessa	cardui	22.IX.2007	Netherlands	52.9392	5.03182	Larva	1
Vanessa	cardui	15.VII.2007	Norway	59.5294	10.6917	Larva
Vanessa	cardui	02.IX.2007	Spain	42.3852	3.15949	Oviposition
Vanessa	cardui	02.IX.2007	Spain	42.3852	3.15949	Oviposition
Vanessa	cardui	24.VI.2007	Sweden	57.0374	18.2861	Larva	5
Vanessa	cardui	10.VII.2007	Sweden	59.8396	17.5673	Larva	1
Vanessa	cardui	21.VII.2007	Sweden	58.8397	12.5763	Larva	1
Vanessa	cardui	6.VIII.2007	Sweden	57.9214	18.8762	Larva	1
Vanessa	cardui	9.VIII.2007	Sweden	60.7305	17.2457	Larva
Vanessa	cardui	7.VIII.2008	Austria	47.5258	12.5661	Pupa
Vanessa	cardui	7.VIII.2008	Austria	47.5258	12.5661	Pupa
Vanessa	cardui	8.VI.2008	France	48.7718	2.01569	Larva	1
Vanessa	cardui	26.IV.2009	Italy	41.7602	12.7956	Egg
Vanessa	cardui	21.V.2008	Netherlands	51.3956	5.63624	Larva	1
Vanessa	cardui	21.V.2008	Netherlands	51.3891	5.63908	Larva	1
Vanessa	cardui	28.VII.2008	Netherlands	51.9257	4.78488	Larva	2
Vanessa	cardui	23.VIII.2008	Netherlands	51.951	4.7108	Larva	3
Vanessa	cardui	5.VIII.2008	Netherlands	51.9602	4.75431	Larva	3
Vanessa	cardui	4.IX.2008	Netherlands	52.0109	5.43171	Pupa	1
Vanessa	cardui	18.3.2008	Spain	37.7995	-4.14981	Larva	1
Vanessa	cardui	2.IX.2008	Switzerland	47.2957	9.07513	Pupa
Vanessa	cardui	2.IX.2008	Switzerland	47.2957	9.07513	Pupa
Vanessa	cardui		Belgium					Data available from Waarnemingen.be (Natuurpunt and Stichting Natuurinformatie) under request to database managers
Vanessa	cardui	29.VI.2009	Belgium	50.254	5.99582	Larva
Vanessa	cardui		Belgium					Data available from Waarnemingen.be (Natuurpunt and Stichting Natuurinformatie) under request to database managers
Vanessa	cardui		Belgium					Data available from Waarnemingen.be (Natuurpunt and Stichting Natuurinformatie) under request to database managers
Vanessa	cardui		Belgium					Data available from Waarnemingen.be (Natuurpunt and Stichting Natuurinformatie) under request to database managers
Vanessa	cardui		Belgium					Data available from Waarnemingen.be (Natuurpunt and Stichting Natuurinformatie) under request to database managers
Vanessa	cardui		Belgium					Data available from Waarnemingen.be (Natuurpunt and Stichting Natuurinformatie) under request to database managers
Vanessa	cardui		Belgium					Data available from Waarnemingen.be (Natuurpunt and Stichting Natuurinformatie) under request to database managers
Vanessa	cardui		Belgium					Data available from Waarnemingen.be (Natuurpunt and Stichting Natuurinformatie) under request to database managers
Vanessa	cardui		Belgium					Data available from Waarnemingen.be (Natuurpunt and Stichting Natuurinformatie) under request to database managers
Vanessa	cardui		Belgium					Data available from Waarnemingen.be (Natuurpunt and Stichting Natuurinformatie) under request to database managers
Vanessa	cardui		Belgium					Data available from Waarnemingen.be (Natuurpunt and Stichting Natuurinformatie) under request to database managers
Vanessa	cardui		Belgium					Data available from Waarnemingen.be (Natuurpunt and Stichting Natuurinformatie) under request to database managers
Vanessa	cardui		Belgium					Data available from Waarnemingen.be (Natuurpunt and Stichting Natuurinformatie) under request to database managers
Vanessa	cardui		Belgium					Data available from Waarnemingen.be (Natuurpunt and Stichting Natuurinformatie) under request to database managers
Vanessa	cardui		Belgium					Data available from Waarnemingen.be (Natuurpunt and Stichting Natuurinformatie) under request to database managers
Vanessa	cardui		Belgium					Data available from Waarnemingen.be (Natuurpunt and Stichting Natuurinformatie) under request to database managers
Vanessa	cardui		Belgium	50.76	5.65442	Larva	1
Vanessa	cardui		Belgium					Data available from Waarnemingen.be (Natuurpunt and Stichting Natuurinformatie) under request to database managers
Vanessa	cardui		Belgium					Data available from Waarnemingen.be (Natuurpunt and Stichting Natuurinformatie) under request to database managers
Vanessa	cardui		Belgium					Data available from Waarnemingen.be (Natuurpunt and Stichting Natuurinformatie) under request to database managers
Vanessa	cardui		Belgium					Data available from Waarnemingen.be (Natuurpunt and Stichting Natuurinformatie) under request to database managers
Vanessa	cardui	3.XIII.2009	Belgium	50.254	5.99582	Larva
Vanessa	cardui		Belgium					Data available from Waarnemingen.be (Natuurpunt and Stichting Natuurinformatie) under request to database managers
Vanessa	cardui		Belgium					Data available from Waarnemingen.be (Natuurpunt and Stichting Natuurinformatie) under request to database managers
Vanessa	cardui		Belgium					Data available from Waarnemingen.be (Natuurpunt and Stichting Natuurinformatie) under request to database managers
Vanessa	cardui		Belgium					Data available from Waarnemingen.be (Natuurpunt and Stichting Natuurinformatie) under request to database managers
Vanessa	cardui		Belgium					Data available from Waarnemingen.be (Natuurpunt and Stichting Natuurinformatie) under request to database managers
Vanessa	cardui		Belgium					Data available from Waarnemingen.be (Natuurpunt and Stichting Natuurinformatie) under request to database managers
Vanessa	cardui		Belgium					Data available from Waarnemingen.be (Natuurpunt and Stichting Natuurinformatie) under request to database managers
Vanessa	cardui		Belgium					Data available from Waarnemingen.be (Natuurpunt and Stichting Natuurinformatie) under request to database managers
Vanessa	cardui		Belgium					Data available from Waarnemingen.be (Natuurpunt and Stichting Natuurinformatie) under request to database managers
Vanessa	cardui		Belgium					Data available from Waarnemingen.be (Natuurpunt and Stichting Natuurinformatie) under request to database managers
Vanessa	cardui		Belgium					Data available from Waarnemingen.be (Natuurpunt and Stichting Natuurinformatie) under request to database managers
Vanessa	cardui		Belgium					Data available from Waarnemingen.be (Natuurpunt and Stichting Natuurinformatie) under request to database managers
Vanessa	cardui		Belgium					Data available from Waarnemingen.be (Natuurpunt and Stichting Natuurinformatie) under request to database managers
Vanessa	cardui		Belgium					Data available from Waarnemingen.be (Natuurpunt and Stichting Natuurinformatie) under request to database managers
Vanessa	cardui	3.XIII.2009	Belgium	50.254	5.99582	Larva
Vanessa	cardui		Belgium					Data available from Waarnemingen.be (Natuurpunt and Stichting Natuurinformatie) under request to database managers
Vanessa	cardui		Belgium					Data available from Waarnemingen.be (Natuurpunt and Stichting Natuurinformatie) under request to database managers
Vanessa	cardui		Belgium					Data available from Waarnemingen.be (Natuurpunt and Stichting Natuurinformatie) under request to database managers
Vanessa	cardui		Belgium					Data available from Waarnemingen.be (Natuurpunt and Stichting Natuurinformatie) under request to database managers
Vanessa	cardui		Belgium					Data available from Waarnemingen.be (Natuurpunt and Stichting Natuurinformatie) under request to database managers
Vanessa	cardui		Belgium					Data available from Waarnemingen.be (Natuurpunt and Stichting Natuurinformatie) under request to database managers
Vanessa	cardui		Belgium					Data available from Waarnemingen.be (Natuurpunt and Stichting Natuurinformatie) under request to database managers
Vanessa	cardui		Belgium					Data available from Waarnemingen.be (Natuurpunt and Stichting Natuurinformatie) under request to database managers
Vanessa	cardui		Belgium					Data available from Waarnemingen.be (Natuurpunt and Stichting Natuurinformatie) under request to database managers
Vanessa	cardui		Belgium					Data available from Waarnemingen.be (Natuurpunt and Stichting Natuurinformatie) under request to database managers
Vanessa	cardui		Belgium					Data available from Waarnemingen.be (Natuurpunt and Stichting Natuurinformatie) under request to database managers
Vanessa	cardui		Belgium					Data available from Waarnemingen.be (Natuurpunt and Stichting Natuurinformatie) under request to database managers
Vanessa	cardui		Belgium					Data available from Waarnemingen.be (Natuurpunt and Stichting Natuurinformatie) under request to database managers
Vanessa	cardui		Belgium					Data available from Waarnemingen.be (Natuurpunt and Stichting Natuurinformatie) under request to database managers
Vanessa	cardui		Belgium					Data available from Waarnemingen.be (Natuurpunt and Stichting Natuurinformatie) under request to database managers
Vanessa	cardui		Belgium					Data available from Waarnemingen.be (Natuurpunt and Stichting Natuurinformatie) under request to database managers
Vanessa	cardui		Belgium					Data available from Waarnemingen.be (Natuurpunt and Stichting Natuurinformatie) under request to database managers
Vanessa	cardui		Belgium					Data available from Waarnemingen.be (Natuurpunt and Stichting Natuurinformatie) under request to database managers
Vanessa	cardui		Belgium					Data available from Waarnemingen.be (Natuurpunt and Stichting Natuurinformatie) under request to database managers
Vanessa	cardui		Belgium					Data available from Waarnemingen.be (Natuurpunt and Stichting Natuurinformatie) under request to database managers
Vanessa	cardui		Belgium					Data available from Waarnemingen.be (Natuurpunt and Stichting Natuurinformatie) under request to database managers
Vanessa	cardui	29.VII.2009	Czech Republic	49.755	15.872	Pupa
Vanessa	cardui	1.VI.2009	Denmark	55.3893	12.3529	Eggs	2
Vanessa	cardui	3.VII.2009	Denmark	56.184	9.43071	Larva	1
Vanessa	cardui	1.VI.2009	Denmark	55.3893	12.3529	Eggs	2
Vanessa	cardui	3.VII.2009	Denmark	56.184	9.43071	Larva	1
Vanessa	cardui	25.VII.2009	Denmark	55.8211	12.5313	Larva	1
Vanessa	cardui	17.IX.2009	Denmark	55.9063	8.43431	Larva	1
Vanessa	cardui	5.VI.2009	France	48.6365	-2.13221	Larva
Vanessa	cardui	4.VI.2009	France	44.1351	0.648069	Larva	2
Vanessa	cardui	30.V.2009	France	43.1082	6.00503	Larva
Vanessa	cardui	4.VI.2009	France	45.7753	1.21928	Larva
Vanessa	cardui	3.VI.2009	France	44.3465	4.07569	Pupa
Vanessa	cardui	29.V.2009	France	46.3446	2.88717	Oviposition
Vanessa	cardui	5.VII.2009	France	45.6485	6.09378	Larva
Vanessa	cardui	15.VI.2009	France	50.5344	2.94545	Larva
Vanessa	cardui	20.VI.2009	France	46.3223	3.23739	Larva
Vanessa	cardui	22.VI.2009	France	49.3962	3.38925	Larva
Vanessa	cardui	14.VI.2009	France	49.1953	2.48383	Larva	3
Vanessa	cardui	5.VI.2009	France	48.6365	-2.13221	Larva
Vanessa	cardui	4.VI.2009	France	44.1351	0.648069	Larva	2
Vanessa	cardui	4.VI.2009	France	45.7753	1.21928	Larva
Vanessa	cardui	29.VI.2009	France	49.4069	5.22994	Larva
Vanessa	cardui	18.VI.2009	France	46.7458	1.05074	Larva	1
Vanessa	cardui	3.VI.2009	France	44.3465	4.07569	Pupa
Vanessa	cardui	26.VI.2009	France	46.5027	2.60717	Larva
Vanessa	cardui	21.VI.2009	France	48.3649	3.31372	Larva
Vanessa	cardui	14.VI.2009	France	46.6957	1.21673	Larva	1
Vanessa	cardui	24.VI.2009	France	45.5851	5.96349	Larva
Vanessa	cardui	29.VI.2009	France	45.5851	5.96349	Larva
Vanessa	cardui	3.VII.2009	France	46.7097	2.51625	Larva
Vanessa	cardui	11.VI.2009	France	48.1776	3.08905	Larva
Vanessa	cardui	28.VI.2009	France	46.7489	0.958086	Larva
Vanessa	cardui	5.VII.2009	France	45.6485	6.09378	Larva
Vanessa	cardui	4.VIII.2009	France	45.222	6.77687	Larva
Vanessa	cardui	3.VII.2009	France	46.7097	2.51625	Larva
Vanessa	cardui	19.VII.2009	France	48.1776	3.08905	Larva
Vanessa	cardui	23.VII.2009	France	44.8413	6.48493	Larva
Vanessa	cardui	15.VII.2009	France	47.7837	3.2141	Larva
Vanessa	cardui	4.VIII.2009	France	45.222	6.77687	Larva
Vanessa	cardui	6.VIII.2009	France	42.5346	2.39651	Larva
Vanessa	cardui	3.IX.2009	France	46.7149	4.94627	Larva
Vanessa	cardui	3.IX.2009	France	46.7149	4.94627	Larva
Vanessa	cardui	6.VII.2009	Germany	49.8314	8.90661	Pupa
Vanessa	cardui	5.VII.2009	Germany	49.4965	8.91312	Pupa
Vanessa	cardui	VII.2009	Germany	52.6019	13.1946	Larva
Vanessa	cardui	6.VII.2009	Germany	49.8314	8.90661	Pupa
Vanessa	cardui	VII.2009	Germany	49.8314	8.90661	Larva
Vanessa	cardui	5.VII.2009	Germany	49.4965	8.91312	Pupa
Vanessa	cardui	5.IX.2009	Germany	51.3763	6.73932	Larva
Vanessa	cardui	4.IX.2009	Germany	52.6019	13.1946	Larva
Vanessa	cardui	5.IX.2009	Germany	47.8683	7.96726	Pupa
Vanessa	cardui	5.IX.2009	Germany	51.3763	6.73932	Larva
Vanessa	cardui	4.IX.2009	Germany	52.6019	13.1946	Larva
Vanessa	cardui	5.IX.2009	Germany	47.8683	7.96726	Pupa
Vanessa	cardui	4.VI.2009	Greece	38.0332	22.1229	Larva
Vanessa	cardui	4.VI.2009	Greece	38.0332	22.1229	Larva
Vanessa	cardui	30.V.2009	Ireland	54.1979	-8.56615	Eggs	10
Vanessa	cardui	2.VI.2009	Ireland	54.5661	-8.2148	Oviposition	100
Vanessa	cardui	1.VI.2009	Ireland	55.0661	-7.49693	Oviposition	100
Vanessa	cardui	3.VI.2009	Ireland	54.6325	-8.13275	Oviposition
Vanessa	cardui	2.VI.2009	Ireland	54.5691	-8.21181	Oviposition	300
Vanessa	cardui	2.VI.2009	Ireland	54.5661	-8.2148	Oviposition	100
Vanessa	cardui	2.VII.2009	Ireland	54.5661	-8.2148	Pupa
Vanessa	cardui	1.VI.2009	Ireland	55.0661	-7.49693	Oviposition	100
Vanessa	cardui	6.VI.2009	Ireland	55.0661	-7.49693	Oviposition	1000
Vanessa	cardui	12.VI.2009	Ireland	54.6325	-8.13275	Eggs
Vanessa	cardui	24.VI.2009	Ireland	54.6325	-8.13275	Larva	100
Vanessa	cardui	3.VI.2009	Ireland	54.6325	-8.13275	Oviposition
Vanessa	cardui	2.VI.2009	Ireland	54.5691	-8.21181	Oviposition	300
Vanessa	cardui	2.VII.2009	Ireland	54.5691	-8.21181	Larva	10
Vanessa	cardui	8.VI.2009	Ireland	54.5691	-8.21181	Eggs	1000
Vanessa	cardui	12.VII.2009	Ireland	53.1795	-6.5926	Larva
Vanessa	cardui	12.VII.2009	Ireland	54.5661	-8.2148	Larva
Vanessa	cardui	12.VII.2009	Ireland	54.5661	-8.2148	Larva
Vanessa	cardui	12.VII.2009	Ireland	54.5661	-8.2148	Larva
Vanessa	cardui	2.VII.2009	Ireland	54.5661	-8.2148	Pupa
Vanessa	cardui	12.VII.2009	Ireland	53.2865	-6.14134	Larva	7
Vanessa	cardui	9.VII.2009	Ireland	55.1806	-7.98776	Larva	100
Vanessa	cardui	9.VII.2009	Ireland	55.1833	-7.98858	Larva	100
Vanessa	cardui	8.VII.2009	Ireland	54.3407	-8.60083	Larva	6
Vanessa	cardui	8.VII.2009	Ireland	54.3395	-8.60554	Larva	6
Vanessa	cardui	16.VII.2009	Ireland	54.6325	-8.13275	Larva	20
Vanessa	cardui	16.VII.2009	Ireland	54.6325	-8.13275	Larva
Vanessa	cardui	2.VII.2009	Ireland	54.5691	-8.21181	Larva	10
Vanessa	cardui	12.VII.2009	Ireland	53.2952	-6.14994	Larva	6
Vanessa	cardui	12.VII.2009	Ireland	53.2952	-6.14994	Larva	1
Vanessa	cardui	16.VII.2009	Ireland	54.5692	-8.45816	Larva
Vanessa	cardui	12.VII.2009	Ireland	52.2041	-6.64763	Larva	10
Vanessa	cardui	5.X.2009	Ireland	53.2865	-6.14134	Larva	10
Vanessa	cardui	5.X.2009	Ireland	53.2929	-6.13336	Larva	10
Vanessa	cardui	10.X.2009	Ireland	53.2679	-6.10398	Larva	1
Vanessa	cardui	31.X.2009	Ireland	53.2679	-6.10398	Larva	1
Vanessa	cardui	17.X.2009	Ireland	53.2694	-6.0998	Larva	1
Vanessa	cardui	31.X.2009	Ireland	53.2694	-6.0998	Larva	1
Vanessa	cardui	5.X.2009	Ireland	53.2865	-6.14134	Larva	10
Vanessa	cardui	5.X.2009	Ireland	53.2929	-6.13336	Larva	10
Vanessa	cardui	8.VII.2009	Ireland	52.5923	-7.78519	Larva	2
Vanessa	cardui	24.VII.2009	Italy	42.133	13.5245	Larva
Vanessa	cardui	III.2009	Morocco	30.4956	-8.81164	Large emergence	1000
Vanessa	cardui	26.III.2009	Morocco	31.4432	-5.34376	Egg
Vanessa	cardui	26.III.2009	Morocco	31.4499	-5.3435	Larva
Vanessa	cardui	26.III.2009	Morocco	31.1378	-5.19933	Larva
Vanessa	cardui	26.III.2009	Morocco	30.7925	-5.51665	Larva
Vanessa	cardui	26.III.2009	Morocco	30.7907	-5.57508	Larva
Vanessa	cardui	27.III.2009	Morocco	30.6557	-6.55637	Larva
Vanessa	cardui	27.III.2009	Morocco	30.5271	-6.89735	Larva
Vanessa	cardui	27.III.2009	Morocco	30.4681	-6.97508	Larva
Vanessa	cardui	27.III.2009	Morocco	30.433	-6.93248	Larva
Vanessa	cardui	27.III.2009	Morocco	30.5244	-7.90577	Larva
Vanessa	cardui	27.III.2009	Morocco	30.4324	-6.92481	Larva
Vanessa	cardui	28.III.2009	Morocco	30.4851	-8.8478	Emergence
Vanessa	cardui	28.III.2009	Morocco	30.6163	-8.17983	Larva
Vanessa	cardui	28.III.2009	Morocco	30.4914	-8.75182	Larva
Vanessa	cardui	28.III.2009	Morocco	30.4895	-8.79206	Larva
Vanessa	cardui	28.III.2009	Morocco	30.4851	-8.8478	Larva
Vanessa	cardui	29.III.2009	Morocco	30.4321	-8.89851	Larva
Vanessa	cardui	29.III.2009	Morocco	30.0606	-9.07478	Larva
Vanessa	cardui	29.III.2009	Morocco	29.9889	-9.02804	Larva
Vanessa	cardui	29.III.2009	Morocco	29.8909	-9.00441	Larva
Vanessa	cardui	30.III.2009	Morocco	30.0724	-9.14815	Larva
Vanessa	cardui	30.III.2009	Morocco	31.2798	-8.85758	Larva
Vanessa	cardui	30.III.2009	Morocco	31.5845	-8.57536	Larva
Vanessa	cardui	30.III.2009	Morocco	30.1739	-9.25494	Pupa
Vanessa	cardui	III.2009	Morocco	31.5773	-7.82479	Larva
Vanessa	cardui	III.2009	Morocco	31.5435	-7.53909	Oviposition
Vanessa	cardui	18-29.X.2009	Morocco	30.882	-6.88836	Eggs
Vanessa	cardui	18-29.X.2009	Morocco	30.8735	-6.88194	Eggs
Vanessa	cardui	18-29.X.2009	Morocco	30.8415	-6.80269	Eggs
Vanessa	cardui	18-29.X.2009	Morocco	31.5726	-8.00933	Larva
Vanessa	cardui	18-29.X.2009	Morocco	31.4401	-5.99117	Larva
Vanessa	cardui	18-29.X.2009	Morocco	30.5667	-6.74439	Larva
Vanessa	cardui	18-29.X.2009	Morocco	30.4733	-8.86984	Larva
Vanessa	cardui	18-29.X.2009	Morocco	31.5726	-8.00933	Oviposition
Vanessa	cardui	19.X.2009	Morocco	31.5103	-7.21055	Larva
Vanessa	cardui	20.X.2009	Morocco	31.05	-7.13	Larva
Vanessa	cardui	23.X.2009	Morocco	31.05	-7.13	Larva
Vanessa	cardui	15.XI.2009	Morocco	31.5103	-7.21055	Larva
Vanessa	cardui	2.VI.2009	Netherlands	51.2582	5.78197	Larva	1
Vanessa	cardui	27.VI.2009	Netherlands	51.9498	4.65541	Larva	3
Vanessa	cardui	15.VI.2009	Netherlands	51.5531	5.27112	Larva	1
Vanessa	cardui	27.VI.2009	Netherlands	51.3305	5.71066	Larva	3
Vanessa	cardui	3.VII.2009	Netherlands	52.3709	5.43126	Larva	5
Vanessa	cardui	19.VI.2009	Netherlands	53.2424	6.24834	Larva	1
Vanessa	cardui	8.VI.2009	Netherlands	52.0208	4.73411	Larva	1
Vanessa	cardui	27.VI.2009	Netherlands	53.2804	6.31731	Larva	10
Vanessa	cardui	1.VII.2009	Netherlands	52.1594	5.67324	Larva	50
Vanessa	cardui	26.VI.2009	Netherlands	53.2152	6.28315	Larva	30
Vanessa	cardui	4.VII.2009	Netherlands	51.9719	4.64614	Larva	5
Vanessa	cardui	20.VI.2009	Netherlands	51.9705	4.64675	Larva	13
Vanessa	cardui	27.VI.2009	Netherlands	51.9477	4.66172	Larva	10
Vanessa	cardui	23.VI.2009	Netherlands	51.9819	6.67037	Larva	101
Vanessa	cardui	5.VII.2009	Netherlands	51.9604	4.18073	Larva	1
Vanessa	cardui	29.VI.2009	Netherlands	51.1192	5.85485	Larva	3
Vanessa	cardui	27.VI.2009	Netherlands	52.3394	4.85291	Larva	1
Vanessa	cardui	28.VI.2009	Netherlands	52.1023	6.14376	Larva	1
Vanessa	cardui	22.VI.2009	Netherlands	51.6167	5.7211	Larva	5
Vanessa	cardui	1.VII.2009	Netherlands	53.2306	6.75168	Larva	3
Vanessa	cardui	24.VI.2009	Netherlands	52.3755	5.22628	Larva	30
Vanessa	cardui	28.VI.2009	Netherlands	52.9126	4.99578	Larva	5
Vanessa	cardui	25.VI.2009	Netherlands	51.9558	4.656	Larva	1
Vanessa	cardui	20.VI.2009	Netherlands	51.3812	6.16238	Larva	1
Vanessa	cardui	5.VII.2009	Netherlands	52.5953	5.6381	Larva	10
Vanessa	cardui	26.VI.2009	Netherlands	51.2652	5.6518	Larva	1
Vanessa	cardui	5.VIII.2009	Netherlands	52.0045	5.46177	Pupa	10
Vanessa	cardui	18.VII.2009	Netherlands	53.2694	6.24887	Larva	1
Vanessa	cardui	16.VII.2009	Netherlands	52.1812	4.82306	Larva	10
Vanessa	cardui	4.VII.2009	Netherlands	51.9719	4.64614	Larva	5
Vanessa	cardui	5.VII.2009	Netherlands	52.8353	6.01134	Larva	7
Vanessa	cardui	11.VII.2009	Netherlands	51.761	4.80134	Larva	1
Vanessa	cardui	13.VII.2009	Netherlands	51.9882	4.36389	Larva	1
Vanessa	cardui	1.VII.2009	Netherlands	51.5131	6.16136	Larva	1
Vanessa	cardui	21.VII.2009	Netherlands	52.2827	7.0164	Pupa	1
Vanessa	cardui	5.VII.2009	Netherlands	52.8038	6.08509	Larva	10
Vanessa	cardui	26.VII.2009	Netherlands	52.1308	5.28309	Larva	1
Vanessa	cardui	4.VII.2009	Netherlands	52.6558	4.66228	Larva	6
Vanessa	cardui	27.VII.2009	Netherlands	52.3682	4.76485	Larva	10
Vanessa	cardui	23.VIII.2009	Netherlands	51.8113	4.67743	Larva	1
Vanessa	cardui	9.VIII.2009	Netherlands	52.1493	6.29687	Larva	2
Vanessa	cardui	18.VIII.2009	Netherlands	52.9203	6.03361	Larva	2
Vanessa	cardui	17.IX.2009	Netherlands	52.135	4.32315	Pupa	1
Vanessa	cardui	3.IX.2009	Netherlands	52.4785	5.62271	Larva	2
Vanessa	cardui	27.IX.2008	Netherlands	51.9257	4.78488	Larva	2
Vanessa	cardui	10.IX.2009	Netherlands	52.4338	5.44602	Larva	1
Vanessa	cardui	9.IX.2009	Netherlands	52.0867	5.48433	Pupa	1
Vanessa	cardui	9.IX.2009	Netherlands	52.7584	5.9704	Larva	1
Vanessa	cardui	25.IX.2009	Netherlands	51.9637	5.68356	Larva	1
Vanessa	cardui	04.VIII.2009	Norway	59.1692	11.365	Larva
Vanessa	cardui	04.VIII.2009	Norway	59.1692	11.365	Larva
Vanessa	cardui	25.VI.2009	Russia	44.0144	43.0435	Larva
Vanessa	cardui	25.VI.2009	Russia	44.0144	43.0435	Larva
Vanessa	cardui	29.VI.2009	Russia	44.0144	43.0435	Larva
Vanessa	cardui	29.VI.2009	Russia	44.0144	43.0435	Pupa
Vanessa	cardui	29.VI.2009	Russia	43.956	43.0546	Larva	1
Vanessa	cardui	15.VII.2009	Russia	58.0008	56.0657	Larva	2
Vanessa	cardui	30.VII.2009	Russia	60.153	30.2314	Larva	1
Vanessa	cardui	30.VIII.2009	Russia	44.7276	44.1051	Larva
Vanessa	cardui	11.IX.2009	Russia	41.5357	47.4586	Larva
Vanessa	cardui	26.V.2009	Spain	41.67	2.47	Larva
Vanessa	cardui	31.V.2009	Spain	41.68	2.39	Larva
Vanessa	cardui	19.VI.2009	Spain	42.9764	-5.00589	Larva	1
Vanessa	cardui	19.VI.2009	Spain	42.9764	-5.00589	Larva	1
Vanessa	cardui	6.VI.2009	Spain	41.68	2.39	Larva
Vanessa	cardui	18.VII.2009	Spain	42.9764	-5.00589	Larva	1
Vanessa	cardui	16.VII.2009	Spain	42.256	-2.97549	Larva	2
Vanessa	cardui	16.VII.2009	Spain	42.256	-2.97549	Larva	2
Vanessa	cardui	24.VIII.2009	Spain	42.3	2.05993	Larva
Vanessa	cardui	1.IX.2009	Spain	42.72	-0.34998	Larva
Vanessa	cardui	1.IX.2009	Spain	42.72	-0.34998	Larva
Vanessa	cardui	27.IX.2009	Spain	41.68	2.39	Larva
Vanessa	cardui	5.X.2009	Spain	41.68	2.39	Larva
Vanessa	cardui	10.X.2009	Spain	41.6898	2.40244	Larva
Vanessa	cardui	5.X.2009	Spain	41.68	2.39	Larva
Vanessa	cardui	28.V.2009	Sweden	57.699	11.8813	Larva	1
Vanessa	cardui	3.VII.2009	Sweden	58.7527	17.1133	Egg	50
Vanessa	cardui	12.VII.2009	Sweden	57.1442	12.4905	Larva	10
Vanessa	cardui	1.VIII.2009	Sweden	57.7763	18.8278	Larva	10
Vanessa	cardui	15.VII.2009	Sweden	59.2536	17.1596	Larva	1
Vanessa	cardui	2.VIII.2009	Sweden	57.6526	11.7782	Larva	1
Vanessa	cardui	24.VII.2009	Sweden	56.7774	15.8985	Larva	5
Vanessa	cardui	1.VIII.2009	Sweden	58.8397	16.8623	Larva	1
Vanessa	cardui	7.VII.2009	Sweden	57.262	18.4607	Larva	20
Vanessa	cardui	3.VII.2009	Sweden	58.7527	17.1133	Egg	50
Vanessa	cardui	1.VIII.2009	Sweden	57.7763	18.8278	Larva	10
Vanessa	cardui	2.VIII.2009	Sweden	57.6526	11.7782	Larva	1
Vanessa	cardui	1.VIII.2009	Sweden	58.8397	16.8623	Larva	1
Vanessa	cardui	27.VI.2009	UK	51.071	-1.64796	Larva
Vanessa	cardui	3.VII.2009	UK	51.071	-1.64796	Larva
Vanessa	cardui	30.VI.2009	UK	51.2868	-0.072902	Larva
Vanessa	cardui	2.VII.2009	UK	51.5971	-0.209361	Larva
Vanessa	cardui	29.VI.2009	UK	51.294	-0.816034	Larva
Vanessa	cardui	5.VII.2009	UK	52.452	-3.60736	Larva
Vanessa	cardui	17.VI.2009	UK	51.4968	-0.17783	Larva	1
Vanessa	cardui	17.VI.2009	UK	51.4968	-0.17783	Larva	1
Vanessa	cardui	30.VI.2009	UK	52.2519	-1.44704	Larva	1
Vanessa	cardui	10.VII.2009	UK	50.7503	-2.6547	Larva
Vanessa	cardui	6.VIII.2009	UK	56.2791	-5.6227	Larva
Vanessa	cardui	3.VII.2009	UK	51.071	-1.64796	Larva
Vanessa	cardui	15.VII.2009	UK	52.0063	-3.2479	Larva	1
Vanessa	cardui	12.VII.2009	UK	51.2868	-0.072902	Pupa
Vanessa	cardui	26.VII.2009	UK	51.2868	-0.072902	Larva
Vanessa	cardui	2.VII.2009	UK	51.5971	-0.209361	Larva
Vanessa	cardui	23.VII.2009	UK	50.8601	-2.94185	Larva
Vanessa	cardui	5.VII.2009	UK	52.452	-3.60736	Larva
Vanessa	cardui	VII.2009	UK	53.3418	-3.39487	Pupa
Vanessa	cardui	10.VII.2009	UK	50.7516	-2.65702	Larva	1
Vanessa	cardui	14.VII.2009	UK	52.0063	-3.2479	Pupa	1
Vanessa	cardui	5.IX.2009	UK	51.0436	-4.21931	Larva	1
Vanessa	cardui	5.IX.2009	UK	51.0436	-4.21931	Larva	1
Vanessa	cardui	29.VI.2009	UK	51.2935	-0.816762	Larva	3
Vanessa	cardui		Belgium					Data available from Waarnemingen.be (Natuurpunt and Stichting Natuurinformatie) under request to database managers
Vanessa	cardui		Belgium					Data available from Waarnemingen.be (Natuurpunt and Stichting Natuurinformatie) under request to database managers
Vanessa	cardui		Belgium					Data available from Waarnemingen.be (Natuurpunt and Stichting Natuurinformatie) under request to database managers
Vanessa	cardui		Belgium					Data available from Waarnemingen.be (Natuurpunt and Stichting Natuurinformatie) under request to database managers
Vanessa	cardui		Belgium					Data available from Waarnemingen.be (Natuurpunt and Stichting Natuurinformatie) under request to database managers
Vanessa	cardui		Belgium					Data available from Waarnemingen.be (Natuurpunt and Stichting Natuurinformatie) under request to database managers
Vanessa	cardui		Belgium					Data available from Waarnemingen.be (Natuurpunt and Stichting Natuurinformatie) under request to database managers
Vanessa	cardui	V.2010	France	46.3959	6.23363	Pupa
Vanessa	cardui	IV.2010	Morocco	30.3566	-9.51733	Larva
Vanessa	cardui	IV.2010	Morocco	30.2719	-9.51572	Larva
Vanessa	cardui	IV.2010	Morocco	30.0973	-9.5548	Larva
Vanessa	cardui	IV.2010	Morocco	30.0389	-9.64077	Larva
Vanessa	cardui	IV.2010	Morocco	29.9014	-9.59705	Larva
Vanessa	cardui	IV.2010	Morocco	29.6199	-9.95133	Larva
Vanessa	cardui	IV.2010	Morocco	29.6136	-9.49086	Larva
Vanessa	cardui	IV.2010	Morocco	29.5802	-9.45047	Larva
Vanessa	cardui	IV.2010	Morocco	29.4996	-8.82181	Larva
Vanessa	cardui	IV.2010	Morocco	29.6318	-8.94297	Larva
Vanessa	cardui	IV.2010	Morocco	30.0724	-9.14815	Larva
Vanessa	cardui	IV.2010	Morocco	30.1739	-9.25494	Larva
Vanessa	cardui	IV.2010	Morocco	30.1921	-9.30566	Larva
Vanessa	cardui	IV.2010	Morocco	30.4851	-8.8478	Larva
Vanessa	cardui	IV.2010	Morocco	29.9572	-9.56797	Larva
Vanessa	cardui	IV.2010	Morocco	29.8011	-9.54831	Larva
Vanessa	cardui	IV.2010	Morocco	29.5516	-9.69822	Larva
Vanessa	cardui	IV.2010	Morocco	29.2119	-9.74948	Larva
Vanessa	cardui	IV.2010	Morocco	29.7043	-9.72584	Larva
Vanessa	cardui	IV.2010	Morocco	30.3566	-9.51733	Oviposition
Vanessa	cardui	IV.2010	Morocco	30.2719	-9.51572	Pupa
Vanessa	cardui	IV.2010	Morocco	29.7043	-9.72584	Pupa
Vanessa	cardui	29.VIII.2010	Netherlands	52.0122	5.68148	Larva	1
Vanessa	cardui	11.VII.2010	Serbia	44.9868	20.1435	Egg
Vanessa	cardui	24.II.2010	Spain	28.4227	-14.0584	Larva	2
Vanessa	cardui	27.II.2010	Spain	28.4227	-14.0584	Pupa	1
Vanessa	cardui	5.II.2010	Spain	28.8657	-13.8234	Larva	2
Vanessa	cardui	5.II.2010	Spain	28.8657	-13.8234	Larva	2
Vanessa	cardui	11.VIII.2010	Sweden	57.7725	16.5779	Egg	1
Vanessa	cardui	1.II.2010	Turkey	36.8584	30.9013	Larva	1
Vanessa	cardui	1.II.2010	Turkey	36.8584	30.9013	Larva	1
Vanessa	cardui	17.VI.2011	Belgium	50.254	5.99582	Oviposition
Vanessa	cardui		Belgium					Data available from Waarnemingen.be (Natuurpunt and Stichting Natuurinformatie) under request to database managers
Vanessa	cardui	01.X.2011	Italy	40.8188	16.7549	Larva	1
Vanessa	cardui	01.X.2011	Italy	40.8188	16.7549	Larva	1
Vanessa	cardui	1.VIII.2011	Netherlands	52.6089	4.76396	Larva	6
Vanessa	cardui	1.VIII.2011	Netherlands	52.6089	4.76396	Larva	6
Vanessa	cardui	24.IX.2011	Netherlands	53.1825	6.15867	Larva	1
Vanessa	cardui	30.VI.2011	Sweden	64.735	17.4022	Egg	1
Vanessa	cardui	15.X.2011	UK	50.8501	0.475667	Larva	1
Vanessa	cardui	15.X.2011	Uk	50.8497	0.477289	Larva	1
Vanessa	cardui		Belgium					Data available from Waarnemingen.be (Natuurpunt and Stichting Natuurinformatie) under request to database managers
Vanessa	cardui		Belgium					Data available from Waarnemingen.be (Natuurpunt and Stichting Natuurinformatie) under request to database managers
Vanessa	cardui	29.IX.2012	Italy	40.8188	16.7549	Larva	1
Vanessa	cardui	10.VI.2012	Netherlands	52.6289	6.55961	Larva	1
Vanessa	cardui	7.VI.2012	Netherlands	52.5281	5.91393	Larva	1
Vanessa	cardui	6.VII.2012	Netherlands	51.466	5.45842	Larva	1
Vanessa	cardui	19.VI.2012	Serbia	43.4879	20.53	Pupa
Vanessa	cardui	24.VI.2012	Serbia	42.6093	22.0028	Larva
Vanessa	cardui	23.XII.2012	Spain	36.1391	-5.84045	Larva	1
Vanessa	cardui	30.VI.2012	UK	51.5925	-1.13092	Larva
Vanessa	cardui	30.VIII.2012	UK	51.6116	-4.91467	Larva	1
Vanessa	cardui	30.VIII.2012	UK	51.6117	-4.9153	Larva	1
Vanessa	cardui	26.V.2013	Azerbaijan	40.9708	49.0314	Larva
Vanessa	cardui		Belgium				1	Data available from Waarnemingen.be (Natuurpunt and Stichting Natuurinformatie) under request to database managers
Vanessa	cardui		Belgium				4	Data available from Waarnemingen.be (Natuurpunt and Stichting Natuurinformatie) under request to database managers
Vanessa	cardui		Belgium				4	Data available from Waarnemingen.be (Natuurpunt and Stichting Natuurinformatie) under request to database managers
Vanessa	cardui		Belgium				1	Data available from Waarnemingen.be (Natuurpunt and Stichting Natuurinformatie) under request to database managers
Vanessa	cardui		Belgium				1	Data available from Waarnemingen.be (Natuurpunt and Stichting Natuurinformatie) under request to database managers
Vanessa	cardui		Belgium				1	Data available from Waarnemingen.be (Natuurpunt and Stichting Natuurinformatie) under request to database managers
Vanessa	cardui		Belgium				2	Data available from Waarnemingen.be (Natuurpunt and Stichting Natuurinformatie) under request to database managers
Vanessa	cardui		Belgium				3	Data available from Waarnemingen.be (Natuurpunt and Stichting Natuurinformatie) under request to database managers
Vanessa	cardui		Belgium				1	Data available from Waarnemingen.be (Natuurpunt and Stichting Natuurinformatie) under request to database managers
Vanessa	cardui		Belgium				1	Data available from Waarnemingen.be (Natuurpunt and Stichting Natuurinformatie) under request to database managers
Vanessa	cardui		Belgium				1	Data available from Waarnemingen.be (Natuurpunt and Stichting Natuurinformatie) under request to database managers
Vanessa	cardui	17.II.2013	Egypt	28.5218	34.5081	Larva	5
Vanessa	cardui	3.III.2013	Egypt	28.5306	34.5081	Larva	100
Vanessa	cardui	3.III.2013	Egypt	28.5306	34.5081	Larva	100
Vanessa	cardui	18.VI.2013	Estonia	59.4289	25.412	Larva	1
Vanessa	cardui	X.2013	France	46.3019	5.85001	Larva
Vanessa	cardui	11.VI.2013	Germany	52.7089	12.7119	Larva
Vanessa	cardui	11.VI.2013	Germany	52.7089	12.7119	Pupa
Vanessa	cardui	2.III.2013	Greece	35.0085	25.8258	Larva	1
Vanessa	cardui	2.III.2013	Greece	35.0085	25.8258	Larva	1
Vanessa	cardui	10.IV.2013	Israel	30.9422	34.4091	Pupa	13
Vanessa	cardui	10.IV.2013	Israel	30.9422	34.4091	Pupa	13
Vanessa	cardui	10.IV.2013	Israel	30.9422	34.4091	Larva	1
Vanessa	cardui	29.VI.2013	Italy	43.6685	10.559	Larva	1
Vanessa	cardui	18.VI.2013	Italy	41.3746	15.1608	Larva	1
Vanessa	cardui	VI.2013	Italy	41.2724	13.7291	Larva
Vanessa	cardui	28.X.2013	Italy	41.1243	16.7674	Larva	1
Vanessa	cardui	13.VII.2013	Netherlands	51.2477	5.92995	Larva	1
Vanessa	cardui	2.IX.2008	Netherlands	52.445	6.47352	Larva	1
Vanessa	cardui	2.IX.2008	Netherlands	52.445	6.47352	Larva	1
Vanessa	cardui	17.VI.2013	Serbia	42.4343	21.7464	Larva
Vanessa	cardui	2.VII.2013	Serbia	44.9868	20.1435	Larva
Vanessa	cardui	8.VI.2013	Serbia	43.2374	22.8011	Larva
Vanessa	cardui	2.VII.2013	Serbia	44.9868	20.1435	Larva
Vanessa	cardui	21.VII.2013	Serbia	45.2528	19.8631	Larva
Vanessa	cardui	29.VII.2013	Serbia	42.3986	22.3896	Larva
Vanessa	cardui	II.2013	Spain	28.097	-17.3331	Larva
Vanessa	cardui	1.VI.2013	Spain	39.882	3.078	Larva	1
Vanessa	cardui	1.VI.2013	Spain	39.882	3.078	Larva
Vanessa	cardui	7.V.2009	Spain	41.6121	1.1828	Oviposition	1
Vanessa	cardui	31.V.2013	Spain	39.661	2.725	Larva	1
Vanessa	cardui	31.V.2013	Spain	39.661	2.725	Larva
Vanessa	cardui	1.VI.2013	Spain	39.882	3.078	Larva	1
Vanessa	cardui	1.VI.2013	Spain	39.882	3.078	Larva
Vanessa	cardui	30.VIII.2013	Spain	41.6582	2.32982	Eggs and Oviposition	10
Vanessa	cardui	19.VIII.2013	Spain	41.6391	2.70504	Eggs and Oviposition	10
Vanessa	cardui	27.VII.2013	Sweden	60.5344	15.286	Larva	1
Vanessa	cardui	17.VII.2013	Sweden	58.0452	12.9604	Larva	1
Vanessa	cardui	12.VIII.2013	Sweden	57.4013	11.989	Larva	1
Vanessa	cardui		Belgium					Data available from Waarnemingen.be (Natuurpunt and Stichting Natuurinformatie) under request to database managers
Vanessa	cardui		Belgium					Data available from Waarnemingen.be (Natuurpunt and Stichting Natuurinformatie) under request to database managers
Vanessa	cardui		Belgium					Data available from Waarnemingen.be (Natuurpunt and Stichting Natuurinformatie) under request to database managers
Vanessa	cardui	22.X.2014	Benin	12.0674	3.17654	Emergence + pupae+ larva + oviposition	1000
Vanessa	cardui	25.X.2014	Benin	11.2985	1.57427	Larva	100
Vanessa	cardui	26.X.2014	Benin	11.4514	1.43551	Oviposition
Vanessa	cardui	21.X.2014	Benin	11.6646	2.91516	Emergence + pupae+ larva + oviposition	1000
Vanessa	cardui	6.X.2014	Chad	12.2557	18.818	Emergence	10
Vanessa	cardui	7.X.2014	Chad	11.3426	19.7812	Emergence	10
Vanessa	cardui	2.X.2014	Chad	12.5218	14.8895	Emergence	10
Vanessa	cardui	7.X.2014	Chad	10.8909	19.8204	Emergence	10
Vanessa	cardui	6.X.2014	Chad	12.2557	18.818	Emergence	10
Vanessa	cardui	7.X.2014	Chad	11.3426	19.7812	Emergence	10
Vanessa	cardui	2.X.2014	Chad	12.5218	14.8895	Emergence	10
Vanessa	cardui	7.X.2014	Chad	10.8909	19.8204	Emergence	10
Vanessa	cardui	24.VI.2014	Egypt	28.7887	34.077	Larva	1
Vanessa	cardui	28.X.2014	Ethiopia	9.15882	39.0266	Emergence	10
Vanessa	cardui	5.XI.2014	Ethiopia	9.15882	39.0266	Emergence	10
Vanessa	cardui	8.XI.2014	Ethiopia	9.15882	39.0266	Emergence	10
Vanessa	cardui	23.XI.2014	Ethiopia	7.04186	39.5194	Larva	100
Vanessa	cardui	27.XI.2014	Ethiopia	9.06596	38.613	Larva	20
Vanessa	cardui	28.XI.2014	Ethiopia	9.06093	38.7147	Larva	30
Vanessa	cardui	22.XI.2014	Ethiopia	7.32372	39.2714	Larva	100
Vanessa	cardui	12.XI.2014	Ethiopia	9.15882	39.0266	Emergence	10
Vanessa	cardui	5.XI.2014	Ethiopia	9.15882	39.0266	Emergence	10
Vanessa	cardui	8.XI.2014	Ethiopia	9.15882	39.0266	Emergence	10
Vanessa	cardui	23.III.2014	Iran	30.551	49.1871	Larva	1
Vanessa	cardui	25.IV.2014	Italy	40.771	16.4029	Larva	1
Vanessa	cardui	V.2014	Italy	41.2313	13.7941	Larva	1
Vanessa	cardui	7.VI.2014	Netherlands	51.9954	5.78271	Pupa	1
Vanessa	cardui	28.VII.2014	Netherlands	53.2478	6.15774	Larva	1
Vanessa	cardui	20.VIII.2014	Netherlands	51.9889	4.48236	Larva	2
Vanessa	cardui	1.IX.2008	Netherlands	52.3709	5.43126	Larva	1
Vanessa	cardui	3.IX.2014	Netherlands	52.0047	4.9795	Pupa	1
Vanessa	cardui	16.VIII.2014	Netherlands	51.9751	4.69642	Larva	1
Vanessa	cardui	5.VIII.2014	Netherlands	51.9549	4.65356	Larva	1
Vanessa	cardui	1.IX.2008	Netherlands	52.3709	5.43126	Larva	1
Vanessa	cardui	17.IX.2014	Netherlands	52.5425	6.08597	Pupa	1
Vanessa	cardui	11.II.2014	Qutar	24.7476	51.0765	Larva	20
Vanessa	cardui	3.III.2014	Qutar	25.5117	50.7812	Larva	1
Vanessa	cardui	3.III.2014	Qutar	25.5117	50.7812	Larva	1
Vanessa	cardui	13.VIII.2014	Romania	45.0367	22.6193	Larva	10
Vanessa	cardui	4.XI.2014	Senegal	13.2117	-13.1092	Emergence	100
Vanessa	cardui	4.XI.2014	Senegal	12.5462	-12.1719	Larva	3
Vanessa	cardui	4.XI.2014	Senegal	13.2117	-13.1092	Emergence	100
Vanessa	cardui	4.XI.2014	Senegal	12.5462	-12.1719	Larva	3
Vanessa	cardui	6.XI.2014	Senegal	13.4791	-13.6488	Larva
Vanessa	cardui	6.VI.2014	Serbia	44.6773	20.6079	Larva
Vanessa	cardui	17.VII.2014	Serbia	45.192	20.477	Larva
Vanessa	cardui	9.VII.2014	Serbia	44.6773	20.6079	Egg
Vanessa	cardui	I.2014	Spain	36.444	-6.12111	Larva
Vanessa	cardui	12.IV.2014	Spain	41.6582	2.32982	Larva	1
Vanessa	cardui	16.IV.2014	Spain	41.6582	2.32982	Larva	2
Vanessa	cardui	24.I.2017	Spain	28.1411	-15.5451	Larva	10
Vanessa	cardui	13.I.2014	Spain	28.1411	-15.5451	Oviposition	1
Vanessa	cardui	17.I.2014	Spain	28.1411	-15.5451	Larva	10
Vanessa	cardui	18.I.2014	Spain	28.1411	-15.5451	Larva	1
Vanessa	cardui	11.VII.2014	Sweden	56.755	12.9088	Larva	1
Vanessa	cardui	11.VIII.2014	UK	52.7601	-1.98616	Larva	1
Vanessa	cardui		Belgium				1	Data available from Waarnemingen.be (Natuurpunt and Stichting Natuurinformatie) under request to database managers
Vanessa	cardui		Belgium				1	Data available from Waarnemingen.be (Natuurpunt and Stichting Natuurinformatie) under request to database managers
Vanessa	cardui		Belgium				3	Data available from Waarnemingen.be (Natuurpunt and Stichting Natuurinformatie) under request to database managers
Vanessa	cardui		Belgium				6	Data available from Waarnemingen.be (Natuurpunt and Stichting Natuurinformatie) under request to database managers
Vanessa	cardui		Belgium				3	Data available from Waarnemingen.be (Natuurpunt and Stichting Natuurinformatie) under request to database managers
Vanessa	cardui		Belgium				1	Data available from Waarnemingen.be (Natuurpunt and Stichting Natuurinformatie) under request to database managers
Vanessa	cardui		Belgium				1	Data available from Waarnemingen.be (Natuurpunt and Stichting Natuurinformatie) under request to database managers
Vanessa	cardui		Belgium				1	Data available from Waarnemingen.be (Natuurpunt and Stichting Natuurinformatie) under request to database managers
Vanessa	cardui		Belgium				3	Data available from Waarnemingen.be (Natuurpunt and Stichting Natuurinformatie) under request to database managers
Vanessa	cardui		Belgium				2	Data available from Waarnemingen.be (Natuurpunt and Stichting Natuurinformatie) under request to database managers
Vanessa	cardui		Belgium				1	Data available from Waarnemingen.be (Natuurpunt and Stichting Natuurinformatie) under request to database managers
Vanessa	cardui		Belgium				1	Data available from Waarnemingen.be (Natuurpunt and Stichting Natuurinformatie) under request to database managers
Vanessa	cardui		Belgium				1	Data available from Waarnemingen.be (Natuurpunt and Stichting Natuurinformatie) under request to database managers
Vanessa	cardui		Belgium				1	Data available from Waarnemingen.be (Natuurpunt and Stichting Natuurinformatie) under request to database managers
Vanessa	cardui		Belgium				2	Data available from Waarnemingen.be (Natuurpunt and Stichting Natuurinformatie) under request to database managers
Vanessa	cardui		Belgium				2	Data available from Waarnemingen.be (Natuurpunt and Stichting Natuurinformatie) under request to database managers
Vanessa	cardui		Belgium				1	Data available from Waarnemingen.be (Natuurpunt and Stichting Natuurinformatie) under request to database managers
Vanessa	cardui		Belgium				1	Data available from Waarnemingen.be (Natuurpunt and Stichting Natuurinformatie) under request to database managers
Vanessa	cardui		Denmark	55.7528	11.3095	Larva	3
Vanessa	cardui	VI.2015	France	49.0536	2.08285	Larva	1
Vanessa	cardui	19.VII.2015	France	46.4326	-1.02668	Larva
Vanessa	cardui	27.VI.2015	Germany	48.0703	11.4836	Larva
Vanessa	cardui	5.VII.2015	Germany	51.9715	7.5723	Larva
Vanessa	cardui	5.VII.2015	Germany	51.9715	7.5723	Larva
Vanessa	cardui	11.V.2015	Greece	37.1428	24.5081	Larva
Vanessa	cardui	14.V.2015	Greece	37.1428	24.5081	Pupa	2
Vanessa	cardui	20.XII.2015	Greece	38.3724	26.133	Larva	1
Vanessa	cardui	XII.2015	Israel	30.0548	35.0154	Emergence	500
Vanessa	cardui	XII.2015	Israel	30.0548	35.0154	Oviposition	500
Vanessa	cardui	21.XII.2016	Israel	29.8834	35.0376	Larva	100
Vanessa	cardui	18.V.2015	Italy	37.8663	13.4089	Larva
Vanessa	cardui	29.V.2015	Italy	42.0596	11.9405	Larva	1
Vanessa	cardui	VII.2014	Kenya	0.50013	35.2477	Larva	1
Vanessa	cardui	2.VII.2015	Netherlands	51.3678	3.6851	Larva	1
Vanessa	cardui	5.VII.2015	Netherlands	51.8109	5.01591	Larva	1
Vanessa	cardui	2.VII.2015	Netherlands	51.72	4.45974	Larva	1
Vanessa	cardui	14.VI.2015	Netherlands	51.4016	6.12008	Larva	1
Vanessa	cardui	5.VII.2015	Netherlands	51.0752	5.80582	Larva	3
Vanessa	cardui	17.VII.2015	Netherlands	52.9578	6.20574	Larva	1
Vanessa	cardui	11.VII.2015	Netherlands	52.343	4.56064	Larva	4
Vanessa	cardui	2.VII.2015	Netherlands	51.3678	3.6851	Larva	1
Vanessa	cardui	6.VII.2015	Netherlands	52.3324	5.59298	Larva	1
Vanessa	cardui	9.VII.2015	Netherlands	52.4595	6.02509	Larva	1
Vanessa	cardui	4.VII.2015	Netherlands	52.3374	6.6677	Larva	1
Vanessa	cardui	11.VII.2015	Netherlands	51.4923	6.0771	Larva	2
Vanessa	cardui	11.VII.2015	Netherlands	52.3398	4.56604	Larva	1
Vanessa	cardui	26.VII.2015	Netherlands	52.5857	5.02801	Larva	1
Vanessa	cardui	10.VII.2015	Netherlands	51.4655	6.14028	Pupa	1
Vanessa	cardui	29.X.2015	Netherlands	51.9357	4.31033	Larva	1
Vanessa	cardui	10.V.2015	Serbia	43.0262	21.959	Larva
Vanessa	cardui	2.VI.2015	Serbia	45.1823	20.4968	Larva
Vanessa	cardui	30.V.2015	Serbia	46.1339	19.9379	Larva
Vanessa	cardui	31.V.2015	Serbia	45.3764	20.3008	Larva
Vanessa	cardui	9.VI.2015	Serbia	45.1808	20.4969	Pupa
Vanessa	cardui	18.VI.2015	Serbia	45.376	20.3856	Larva
Vanessa	cardui	2.VI.2015	Serbia	45.1823	20.4968	Larva
Vanessa	cardui	23.VI.2015	Serbia	44.0731	21.7162	Larva
Vanessa	cardui	28.VI.2015	Serbia	45.1802	20.4932	Larva
Vanessa	cardui	8.VI.2015	Serbia	44.0313	20.4293	Larva
Vanessa	cardui	9.VI.2015	Serbia	45.1808	20.4969	Pupa
Vanessa	cardui	15.VII.2015	Serbia	43.3067	19.7356	Larva
Vanessa	cardui	10.VI.2015	Slovenia	45.9104	14.7139	Larva
Vanessa	cardui	4.V.2015	Spain	41.284	1.835	Eggs
Vanessa	cardui	4.V.2015	Spain	41.284	1.835	Eggs
Vanessa	cardui	28.VI.2015	Sweden	57.4206	12.1107	Pupa	1
